# Supplementary material
Source: PubMed Central journal article supplement (PMC2804328)
Supplement: supp_M109.018184_jbc.M109.018184-1.pdf [file supp_M109.018184_jbc.M109.018184-1.pdf]

**Synthesis of heparan sulfate with cyclophilin B-binding properties is determined by cell-type specific expression of sulfotransferases**

**Audrey Deligny<sup>1</sup>, Agnès Denys<sup>1</sup>, Adeline Marcant<sup>1</sup>, Aurélie Melchior<sup>1</sup>, Joël Mazurier<sup>1</sup>, Toin H. van Kuppevelt<sup>2</sup>, and Fabrice Allain<sup>1</sup>**

*From the <sup>1</sup>Unité de Glycobiologie Structurale et Fonctionnelle, Unité Mixte de Recherche No. 8576 du CNRS, Institut de Recherche Fédératif No. 147, Université des Sciences et Technologies de Lille, Villeneuve d'Ascq, France, and the <sup>2</sup>Department of Matrix Biochemistry, Nijmegen Center for Molecular Life Sciences, Nijmegen, The Netherlands.*

**SUPPLEMENTAL DATA**

**TABLE I**  
**Characteristics of specific anti-HS antibodies**

| Antibody | V <sub>H</sub> CDR3 sequence | V <sub>H</sub> family | DP gene | Class of GAG | Modifications involved in binding                                                                        | Modification which may reduce binding                         | References |
|----------|------------------------------|-----------------------|---------|--------------|----------------------------------------------------------------------------------------------------------|---------------------------------------------------------------|------------|
| HS4C3    | GRRLKD                       | 3                     | 38      | HS           | <i>N</i> -sulfation<br>2- <i>O</i> -sulfation<br>6- <i>O</i> -sulfation<br>3- <i>O</i> -sulfation        |                                                               | (30,33,34) |
| HS4E4    | HAPLRNTRTNT                  | 3                     | 38      | HS           | <i>N</i> -acetylation<br><i>N</i> -sulfation<br>C5-epimerization                                         | 2- <i>O</i> -sulfation <sup>a</sup><br>6- <i>O</i> -sulfation | (31,33)    |
| AO4B08   | SLRMNGWRAHQ                  | 3                     | 47      | HS           | <i>N</i> -sulfation<br>C5-epimerization<br>2- <i>O</i> -sulfation <sup>b</sup><br>6- <i>O</i> -sulfation |                                                               | (31,33)    |
| RB4Ea12  | RRYALDY                      | 3                     | 32      | HS           | <i>N</i> -acetylation<br><i>N</i> -sulfation<br>6- <i>O</i> -sulfation                                   |                                                               | (31,33)    |
| IO3H10   | AKRLDW                       | 1                     | 7       | CS           |                                                                                                          |                                                               | (32,33)    |
| MPB49    | WRNDRQ                       | 3                     | 38      | -(control)   | -                                                                                                        |                                                               |            |

Given are the antibody name, amino acid sequence of the V<sub>H</sub> complementary determining region 3 (CDR3), V<sub>H</sub> germ line gene family, DP gene number, the class of GAG with which the antibody reacts, and essential/inhibitory modifications required for antibody binding. <sup>a</sup>Antibody HS4E4 requires essential but unspecified *O*-sulfated residues. <sup>b</sup>Antibody AO4B08 requires an internal 2-*O*-sulfated IdoUA residue.

HS, heparan sulfate; CS, chondroitin sulfate.

**TABLE II**  
**Primers used for real-time RT-PCR analysis**

| Gene    | RefSeq    | PCR primer sequences                                                                 | Product size (bp) |
|---------|-----------|--------------------------------------------------------------------------------------|-------------------|
| NDST1   | NM_001543 | Forward: 5'-ACCACAGCCAGACTGAACGTTTGTG-3'<br>Reverse: 5'-ACAGGGAAATGTCCAGTCTGTCTCC-3' | 443               |
| NDST2   | NM_003635 | Forward: 5'-TTCCAGTCTGGGCTGATGTCCCAGC-3'<br>Reverse: 5'-GTAGATCCCAGTGCCTGGCTAAAGG-3' | 426               |
| 2-OST   | NM_012262 | Forward: 5'-CGAAGTCCGAGAAATTGAGC-3'<br>Reverse: 5'-AATGAAGTGCTTGCCGTTTT-3'           | 123               |
| 3-OST1  | NM_005114 | Forward: 5'-TTATCTCCTCGGCGATTCTTG-3'<br>Reverse: 5'-TAGCCAGTCACTAACTGCTTCTCCAT-3'    | 117               |
| 3-OST3A | NM_006042 | Forward: 5'-CCATCCAGATCGGCATCTACGC-3'                                                | 166               |
| 3-OST3B | NM_006041 | Reverse: 5'-TGCTTGCCGTGATGATCCTCTTG-3'                                               |                   |
| 3-OST5  | NM_153612 | Forward: 5'-TGGGAGCTTGGATAGGCTACA-3'<br>Reverse: 5'-TGGAGGCGAACCTGCTCC-3'            | 159               |
| HPRT    | NM_000194 | Forward: 5'-GACCAGTCAACAGGGGACAT-3'<br>Reverse: 5'-AACACTTCGTGGGGTCCTTTTTC-3'        | 195               |

**TABLE III**  
**Synthetic siRNA used for RNA interference experiments**

| Name     | Target mRNA Sequence                     | Position                         |
|----------|------------------------------------------|----------------------------------|
| siNDST1  | 5'-CCUCCGACUUC <u>U</u> ACUUUGA(dTdT)-3' | 2508-2526                        |
| siNDST2  | 5'-GGACCUUAGU <u>U</u> CCCAACUU(dTdT)-3' | 1591-1609                        |
| si2-OST  | 5'-GCGCUUUGUA <u>AA</u> GAAUAUA(dTdT)-3' | 749-767                          |
| si3-OST3 | 5'-CGGACAAGCAC <u>U</u> UCUACUU(dTdT)-3' | 1808-1826 (3A)<br>1295-1313 (3B) |
| siGFP    | 5'-GAACGGCAUCAAGGUGAACTT(dTdT)-3'        |                                  |

Negative controls with two-bases changes were designed from the sequences of specific siRNA. Modified nucleotides are underlined in target mRNA sequences. Changes were as follows: U → A and A → U.

## LEGEND TO SUPPLEMENTAL FIGURES

**FIGURE S1. Inhibition of the expression of mRNAs encoding NDST1, NDST2, 2-OST and 3-OST3 by RNA interference.** Synthetic siRNAs (siNDST1, siNDST2, si2-OST, si3-OST3) were used to specifically inhibit the expression of mRNAs encoding NDST1, NDST2, 2-OST and 3-OST3 in Jurkat T cells. Negative control siRNAs, in which two nucleotides have been changed from the target sequences, were used to demonstrate the specificity of silencing. A synthetic siRNA targeting GFP transcript (siGFP) was used as irrelevant siRNA. **(A)** The expression of mRNAs encoding each sulfotransferases was quantified at 24 h, 48 h and 72 h in treated Jurkat T cells by real-time RT-PCR. HPRT mRNA was used to normalize the expression of the genes of interest. **(B)** In order to check for the absence of any cross-reactivity, the levels of mRNA encoding NDST1, NDST2, 2-OST and 3-OST3 were quantified after 48 h of cell treatment with each specific siRNA. Results are presented as percentages of mRNA expression of HS sulfotransferases in cells treated with specific or negative control siRNAs relative to the maximal values obtained with irrelevant siRNA, which were set at 100 %. Each bar of the histograms represents mean  $\pm$  SD of triplicates from three separate experiments.

**FIGURE S2. Effect of siRNA targeting HS sulfotransferases on the pattern of sulfation of cell surface HS.** The effect of siRNA treatment on cell surface HS was analyzed by measuring the reactivity of anti-HS antibodies. Jurkat T cells were treated with siRNA that specifically target NDST1, NDST2, 2-OST and 3-OST3 or respective negative control siRNA. A synthetic siRNA targeting GFP transcript (siGFP) was used as irrelevant siRNA. After 48 h of treatment, cells were stained for HS with HS4E4, HS4C3, RB4Ea12 and AO4B08, or for chondroitin sulfate with IO3H10. For rescue experiments, cells were first treated with specific siRNA or corresponding negative control for 24 h. Thereafter, cells were transfected with plasmids expressing sequences refractory to siRNA and stained 24 h later with anti-HS antibodies. Cell surface staining was analyzed by flow cytometry. Data are presented as  $\Delta$ FMV % and are means  $\pm$  SD of three separate experiments.

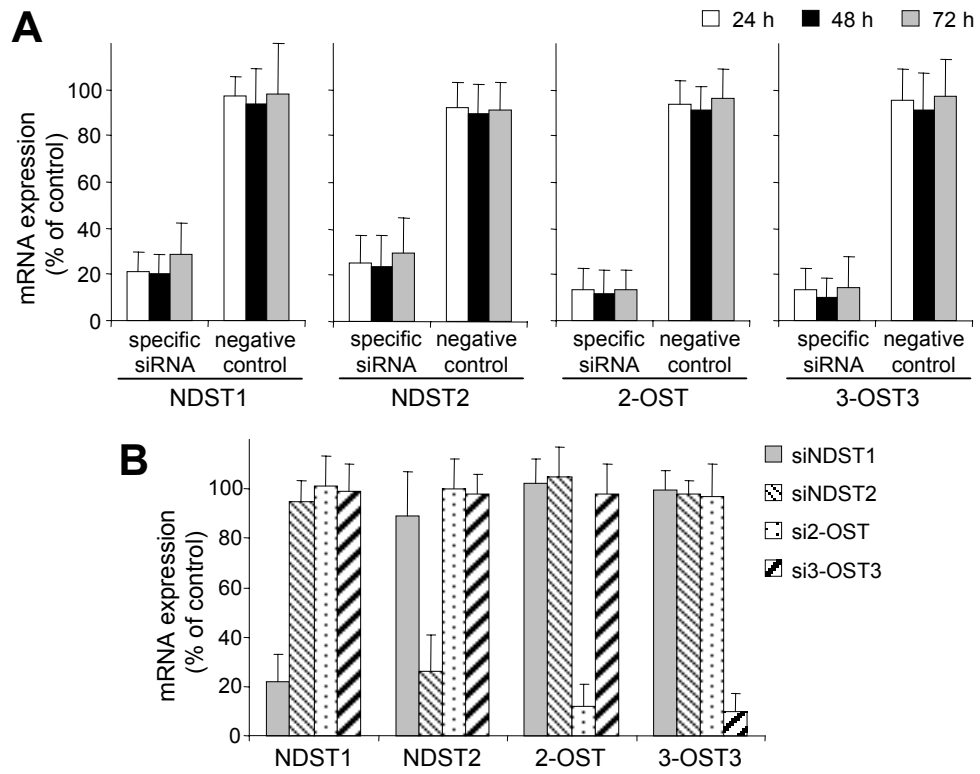

Figure S1

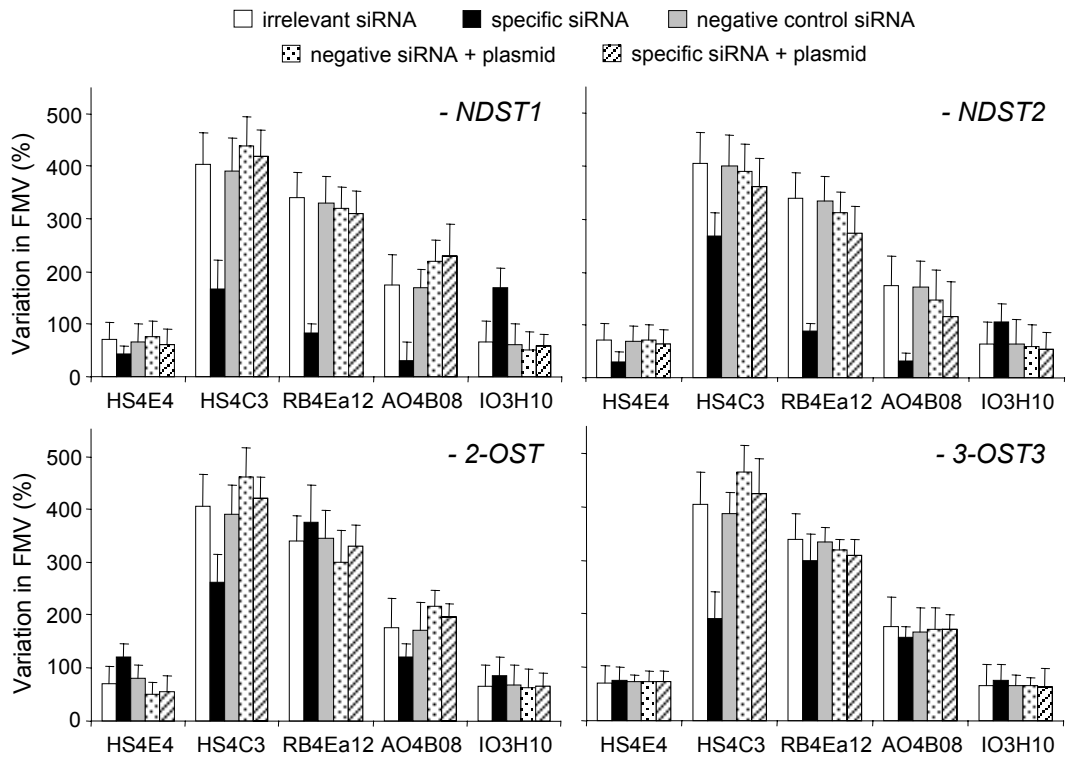

Figure S2
